# Supplementary material for: The genome of Onchocerca volvulus, agent of river blindness
Source: PubMed Central journal article supplement (PMC5310847; doi:10.1038/nmicrobiol.2016.216), 2016-11-21
Supplement: NIHMS848855-supplement-INFO.pdf [file NIHMS848855-supplement-INFO.pdf]

## The genome of *Onchocerca volvulus*, agent of river blindness

Cotton *et al.*

### Supplementary Information:

**Supplementary Figure 1.** Optical maps.

**Supplementary Figure 2.** Patterns of read coverage and heterozygosity in different sequencing libraries.

**Supplementary Figure 3.** Functional classification of the putative proteome and the unique proteins of *O. volvulus*.

**Supplementary Figure 4.** Synteny and colinearity of *O. volvulus* and *O. ochengi* genomes.

**Supplementary Figure 5.** Alignment of conserved regions of collagen prolyl hydroxylase proteins.

**Supplementary Figure 6.** *O. volvulus* Nuclear Hormone Receptors.

**Supplementary Figure 7.** Nucleotide sequences for pLGIC subunits from the glutamate- and GABA- gated chloride-channel family.

**Supplementary Figure 8.** *O. volvulus* protein families identified as potential targets of FDA-approved drugs.

**Supplementary Table 2.** Properties of assemblies and annotations for *Onchocerca volvulus*, *O. ochengi* and other filarial nematodes.

**Supplementary Table 3.** Assignment of scaffolds to autosomes and sex chromosomes based on coverage in male and female sequencing libraries.

**Supplementary Table 4.** Conserved eukaryotic genes from CEGMA set missing from *O. volvulus* and other filarial nematodes.

**Supplementary Table 5.** Repeat content of the *Onchocerca volvulus* genome.

**Supplementary Table 6.** BLAST hits and sequence similarity between *O. volvulus* genes and genes in other nematodes

**Supplementary Table 7.** Putative *O. volvulus* Y-specific contigs and the genes present on these contigs, including gene product names inferred from homology of PFAM domain annotations.

**Supplementary Table 8.** Number of gene copies per species in protein families expanded in *O. volvulus*.

**Supplementary Table 9.** List of classical and orphan nuclear receptors identified in the *O. volvulus* genome and homologues in other species.

**Supplementary Table 10.** Genes participating in embryological and developmental functions in *C. elegans* and their homologues in *O. volvulus*.

**Supplementary Tables 11.** Set of reactions and metabolites used in the metabolic reconstruction of *O. volvulus*.

**Supplementary Tables 12.** Set of reactions and metabolites used in the metabolic reconstruction of *Loa loa*.

**Supplementary Tables 13.** Details of metabolites and their relative contributions to the biomass function for *O. volvulus* and *L. loa*, and details of glycan IDs that were replaced by compound IDs in the metabolic reconstructions.

**Supplementary Table 14.** List of FDA approved drugs that could potentially target 51 individual *O. volvulus* proteins.

**Supplementary Table 15.** Analysis of coding sequence variants and putative functional differences between *wOv* and *wOo* identified using SNPeff.

**Supplementary Table 16.** Gene-based identification of Nuwts in the *O. volvulus* genome.

**Supplementary Table 17.** Nuwts detected by nucmer that are >1 kb in the large scaffolds.

**Supplementary Table 18.** *O. volvulus* proteins of the innate immune system.

**Supplementary Table 19.** Details of DNA and RNA sequencing libraries and accession numbers.

**Supplementary Data:** Excel tables of Ensembl Compara data providing information on gene families and enriched GO terms that are specific to *Onchocerca volvulus*, and to different lineage levels: *Onchocercidae*, *Filarioidea*, and *Chromadorea* (includes *O. ochengi*, *Dirofilaria immitis*, *Wuchereria bancrofti*, *Brugia malayi*, *Loa loa* and *Ascaris suum*).

**a**

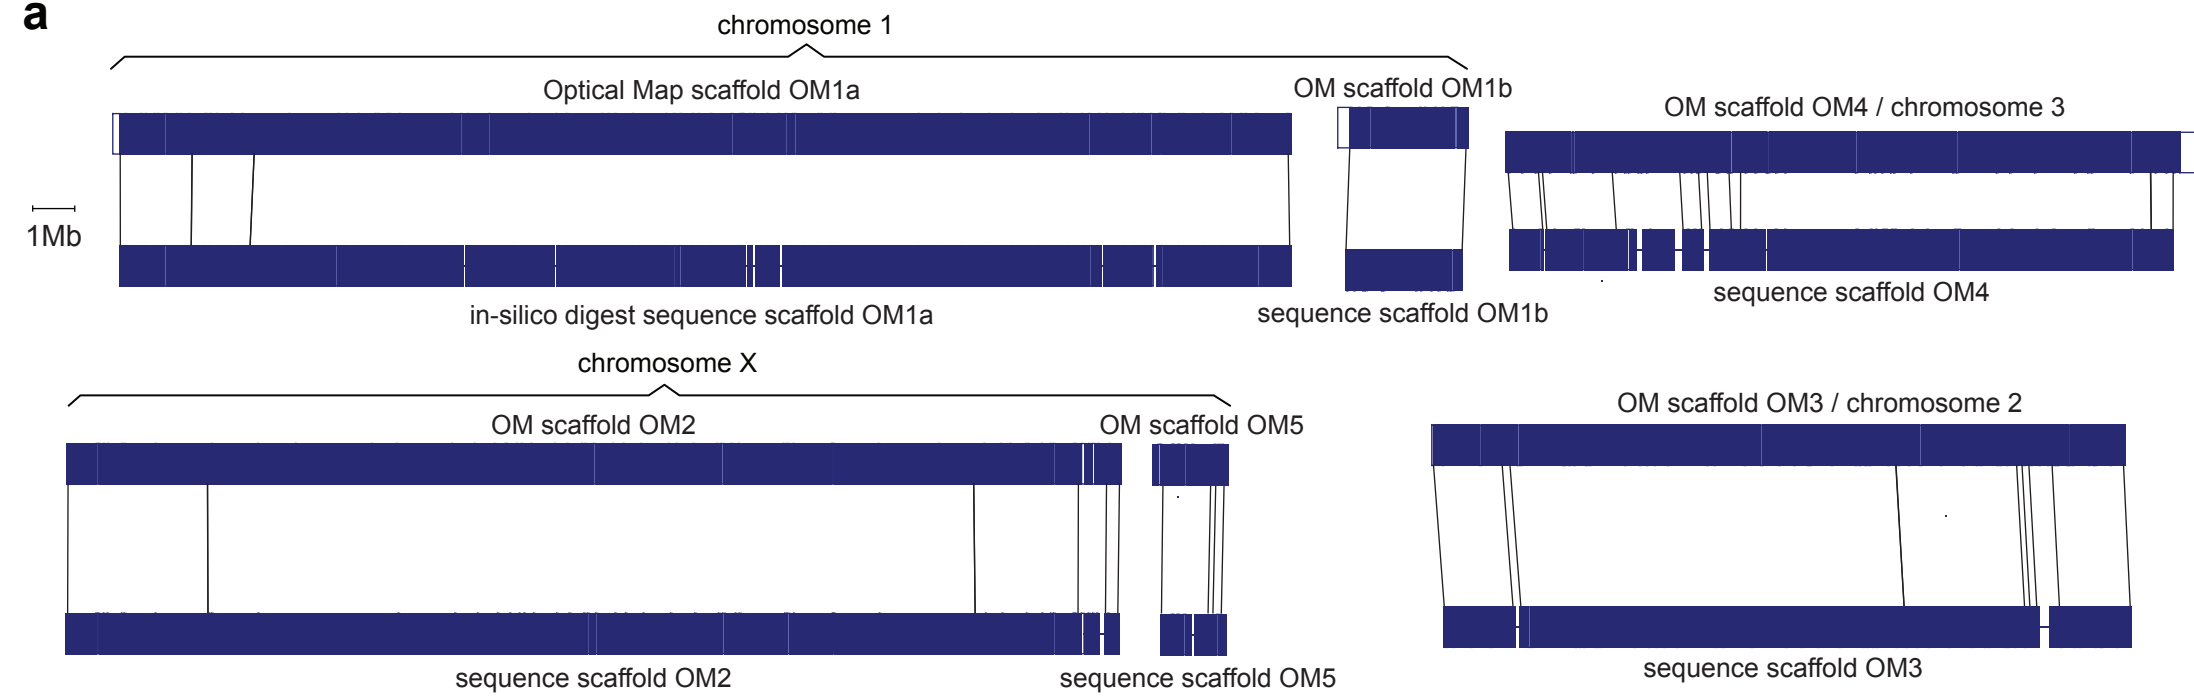

**b**

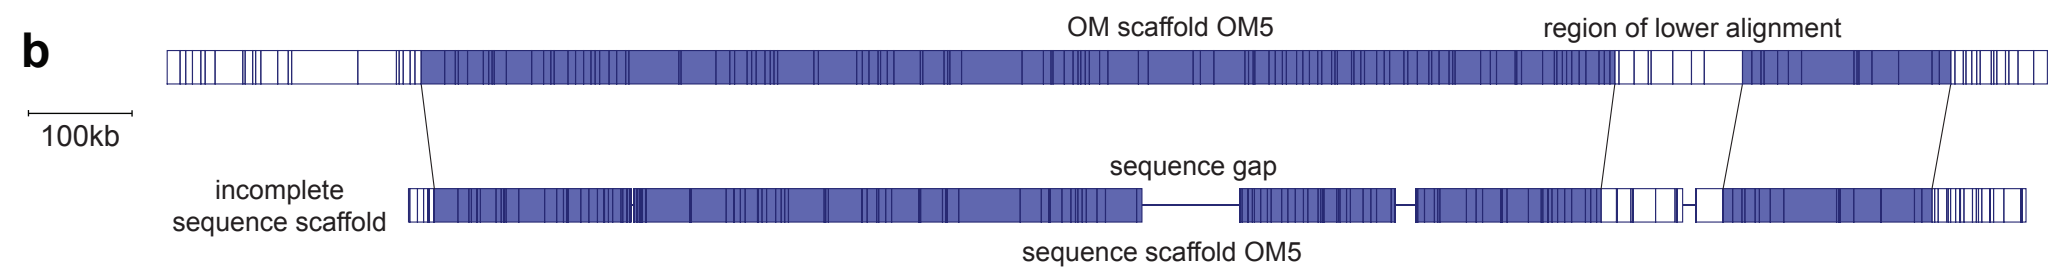

**c**

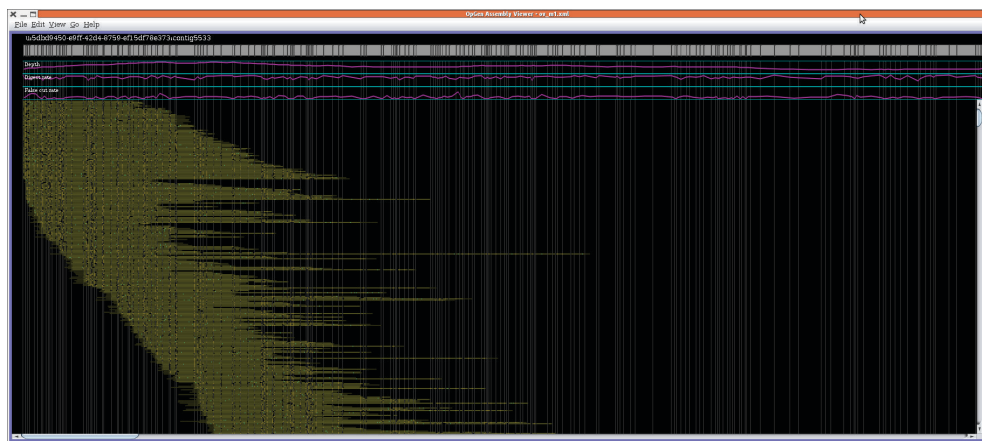

**d**

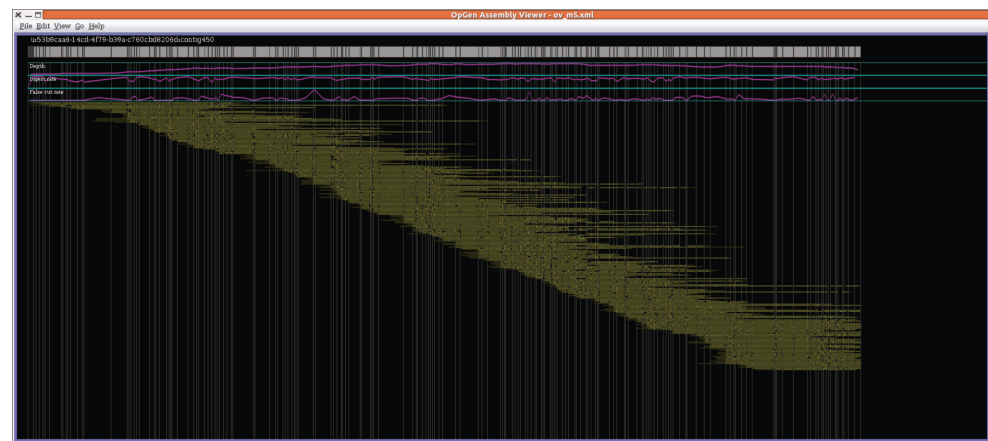

**Supplementary Figure 1. Optical maps.** (a) Genome-wide optical map for *Onchocerca volvulus*, allowing contiguation and scaffolding of sequence data into 6 large scaffolds. Optical map (above) and in-silico digested sequence scaffolds (below) are shown for each chromosome. Individual restriction fragments are not visible at this scale, but the largest gaps in the sequence assembly and small areas in the optical map not covered by large sequence scaffolds are shown. Vertical lines delineate areas of alignment between the two maps. (b) Detailed view of the smallest optical map scaffold (OM5), showing individual restriction fragments (cut sites are shown as vertical lines within rectangles) and showing gaps, uncovered regions and missing sequence regions. (c) and (d) show individual digested molecules aligned against optical map scaffolds. (c) shows a likely chromosome end, where all molecules finish at the end of the map to give a 'blunt' appearance. (d) shows an optical map scaffold end that is not a chromosome end, as molecule alignments 'tail off' at the end of the map.

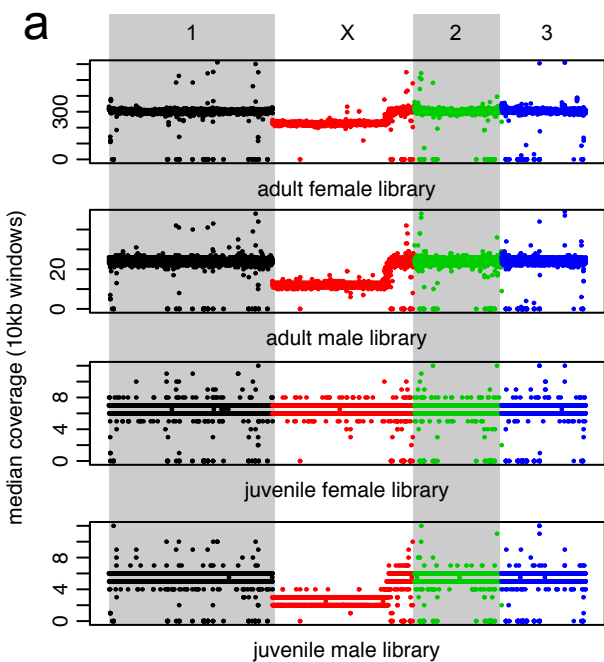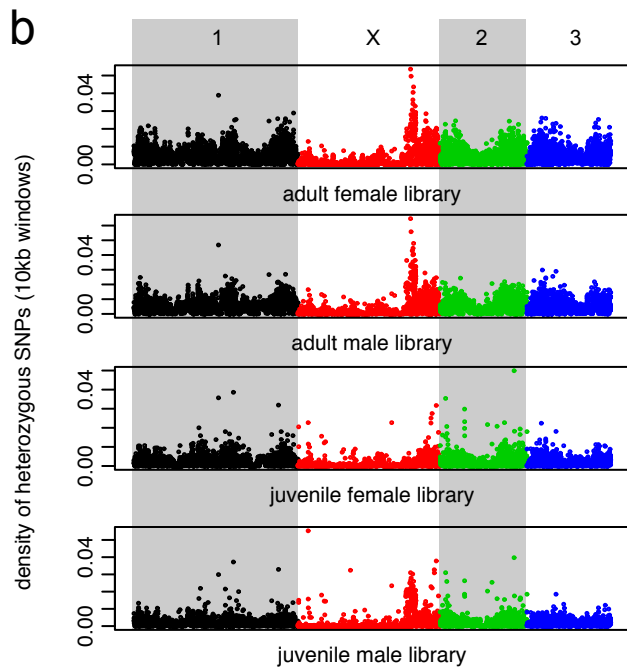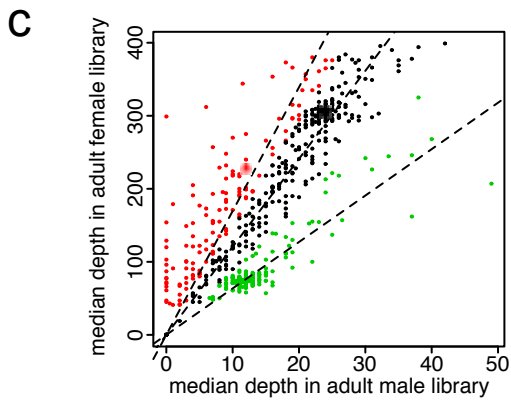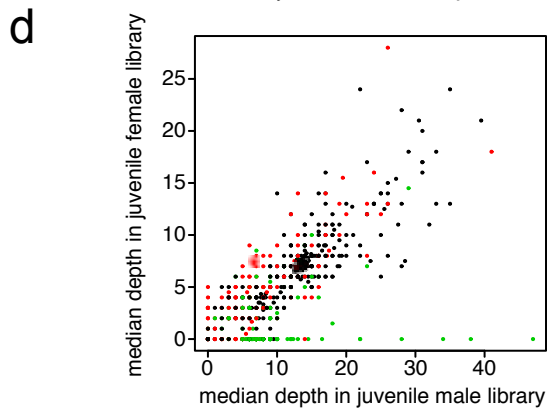

**Supplementary Figure 2. Patterns of read coverage and heterozygosity in different sequencing libraries.** **(a)** Median depth of sequencing read coverage for non-overlapping 10kb windows across chromosomes. Different colored points represent windows from different scaffolds. We see consistently lower coverage across most of chromosome 2 in male samples and in adult females, which are likely gravid with both male and female offspring, but not in (virgin) juvenile females. The drop in coverage coincides with reduced heterozygosity across the 'low coverage' part of chromosome 2, as expected for sex chromosomes. There is also a 'spike' in heterozygosity specifically at the boundary between low and high coverage parts of this scaffold. **(b)** Proportion of heterozygote genotypes in 10 kb windows along the large scaffolds. **(c)** Coverage for all contigs and scaffolds in the assembly for adult samples. **(d)** Coverage for all contigs and scaffolds in the assembly for juvenile female and male worms. Colors of dots distinguish scaffolds assigned to different categories based on the ratio of coverage between adult male and female samples for autosomes (black), X-chromosome specific regions (red) and Y-chromosome specific regions (green) assuming an XY-genotype in male worms and that the 'adult female' sample contains a 50:50 proportion of male and female genotypes. Larger translucent points represent the chromosomes, with chromosome X split into the two regions of different coverage, with the low-coverage region colored red. (c) Shows the same scaffolds colored as in (b). While chromosomes show consistent coverage patterns expected from (c), most putative X-specific (red) small scaffolds do not, and only a subset of Y-specific scaffolds (green) show the expected zero coverage in the juvenile female sample. We propose that many of the small scaffolds instead represent variant haplotypes present in some samples but absent in others.

Supp\_Fig. 3

a

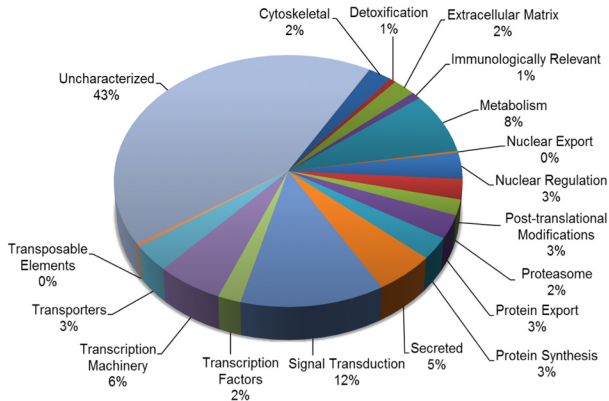

b

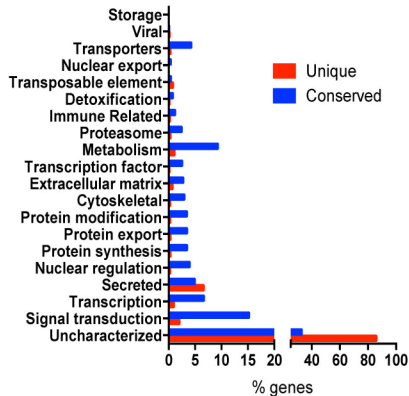



**Supplementary Figure 3. Functional classification of the putative proteome and the unique proteins of *O. volvulus*.** (a) Pie chart showing the functional distribution of the 12,143 putative proteins in *O. volvulus* and (b) the functional distribution of *O. volvulus* unique (<30% max score, blue bars) and conserved subsets (>30% max score, with other nematodes, red bars) of proteins.

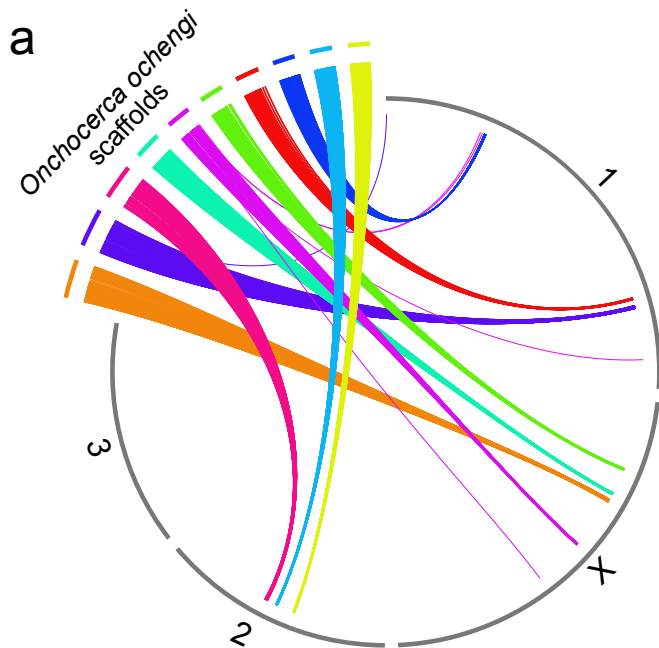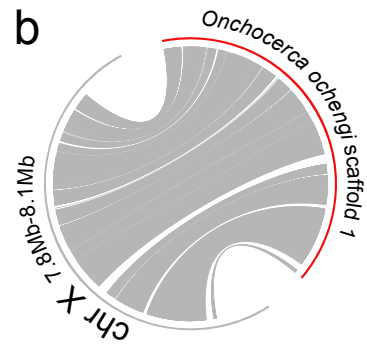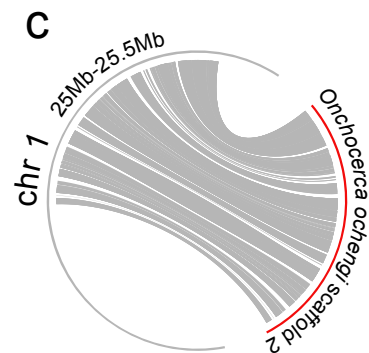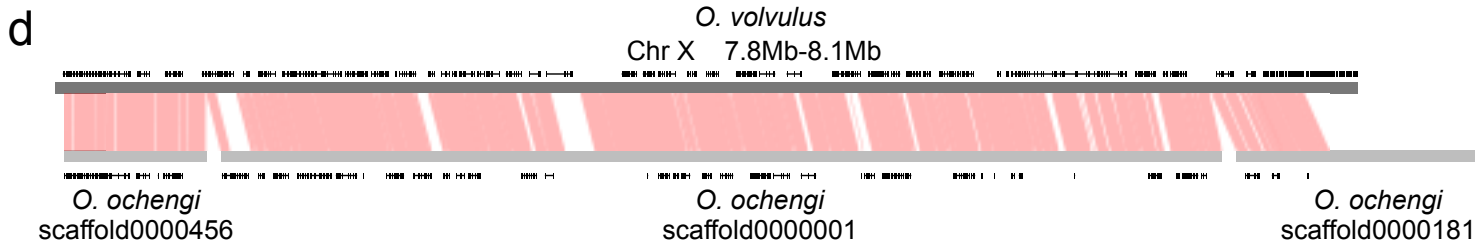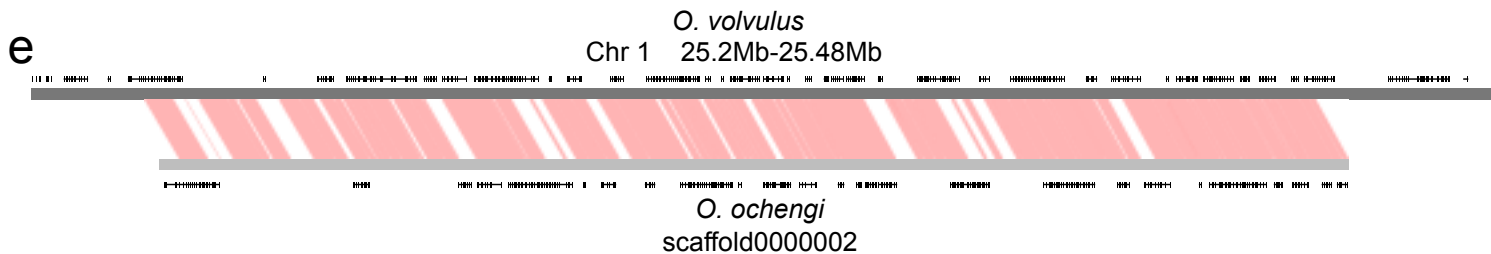

**Supplementary Figure 4. Synteny and colinearity of *O. volvulus* and *O. ochengi* genomes.** **(a)** Comparison of the ten largest *O. ochengi* scaffolds against *O. volvulus* genome assembly. Links show all PROmer hits of at least 98% similarity, colored by *O. ochengi* source. For clarity, *O. ochengi* scaffolds are shown 10x larger than *O. volvulus* scaffolds. *O. ochengi* scaffolds all map to unique regions of *O. volvulus*, confirming synteny between the two genomes. **(b-e)** Detailed views of the same comparisons for the two largest *O. ochengi* scaffolds with relevant regions of *O. volvulus* scaffolds, confirming colinearity of these regions between the two genomes. **(d)** and **(e)** also show annotated gene models (black rectangles show exons, with horizontal lines connecting exons within a gene), showing that most genes are in the same locations and have the same structure, but that more complex multi-exon gene structures are missed in *O. ochengi* annotation, due to the lack of RNAseq evidence needed to annotate these genes correctly. Panel **(d)** shows *O. ochengi* scaffolds with similarity to adjacent regions of *O. volvulus*, indicating that the colinearity is not restricted to the largest *O. ochengi* scaffolds. Both genomes are shown to the same scale in panels **(b-e)**. For clarity, overlapping hits in different reading frames are removed for panels **(d)** and **(e)**.



**Supplementary Figure 5. Alignment of conserved regions of collagen prolyl hydroxylase proteins.** The alignment shows part of a multiple alignment of all *O. volvulus* collagen prolyl hydroxylase proteins annotated together with a human orthologue (AAA36535). The histidine and aspartic acid residues (shaded) that are key to the active site of the collagen prolyl hydroxylase enzyme are conserved in *O. volvulus* genes. A previously published *O. volvulus* sequence (AAL08488) was almost identical to gene model OVOC12598, with identical predicted protein lengths and differing at just 5 amino acid positions out of 571.

Supp\_Fig. 6

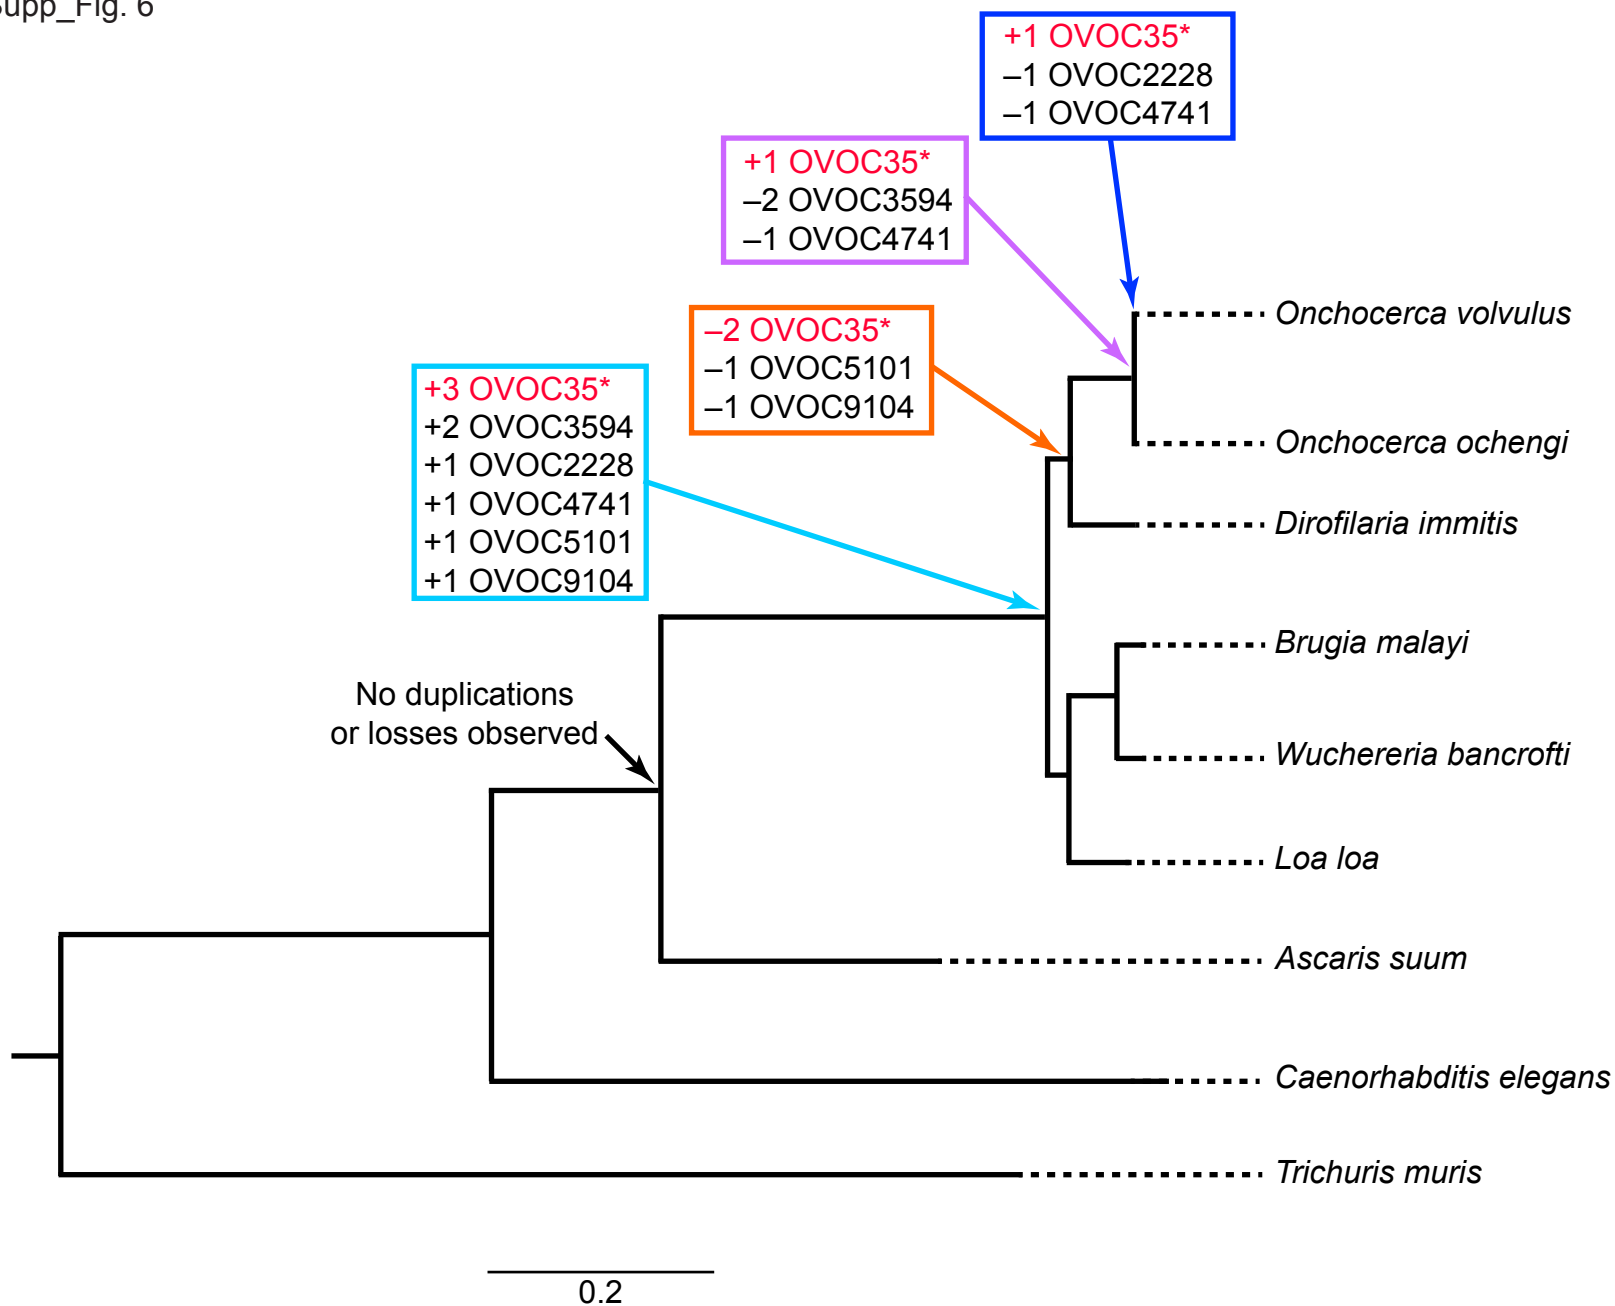

**Supplementary Figure 6. *O. volvulus* Nuclear Hormone Receptors.** Ensembl Compara Analysis of the Nuclear Hormone Receptors across the selective nematode genomes was performed and used to construct the phylogenetic tree of all the filarial nematodes as well as other Ensembl Compara GeneTree species. The boxes show the Gene IDs of the NHRs duplicated or lost during the evolution of the filarial species. The OVOC35\* family consist of 4 NHR genes: OVOC350, OVOC351, OVOC353, and OVOC354.

Supp\_Fig.7

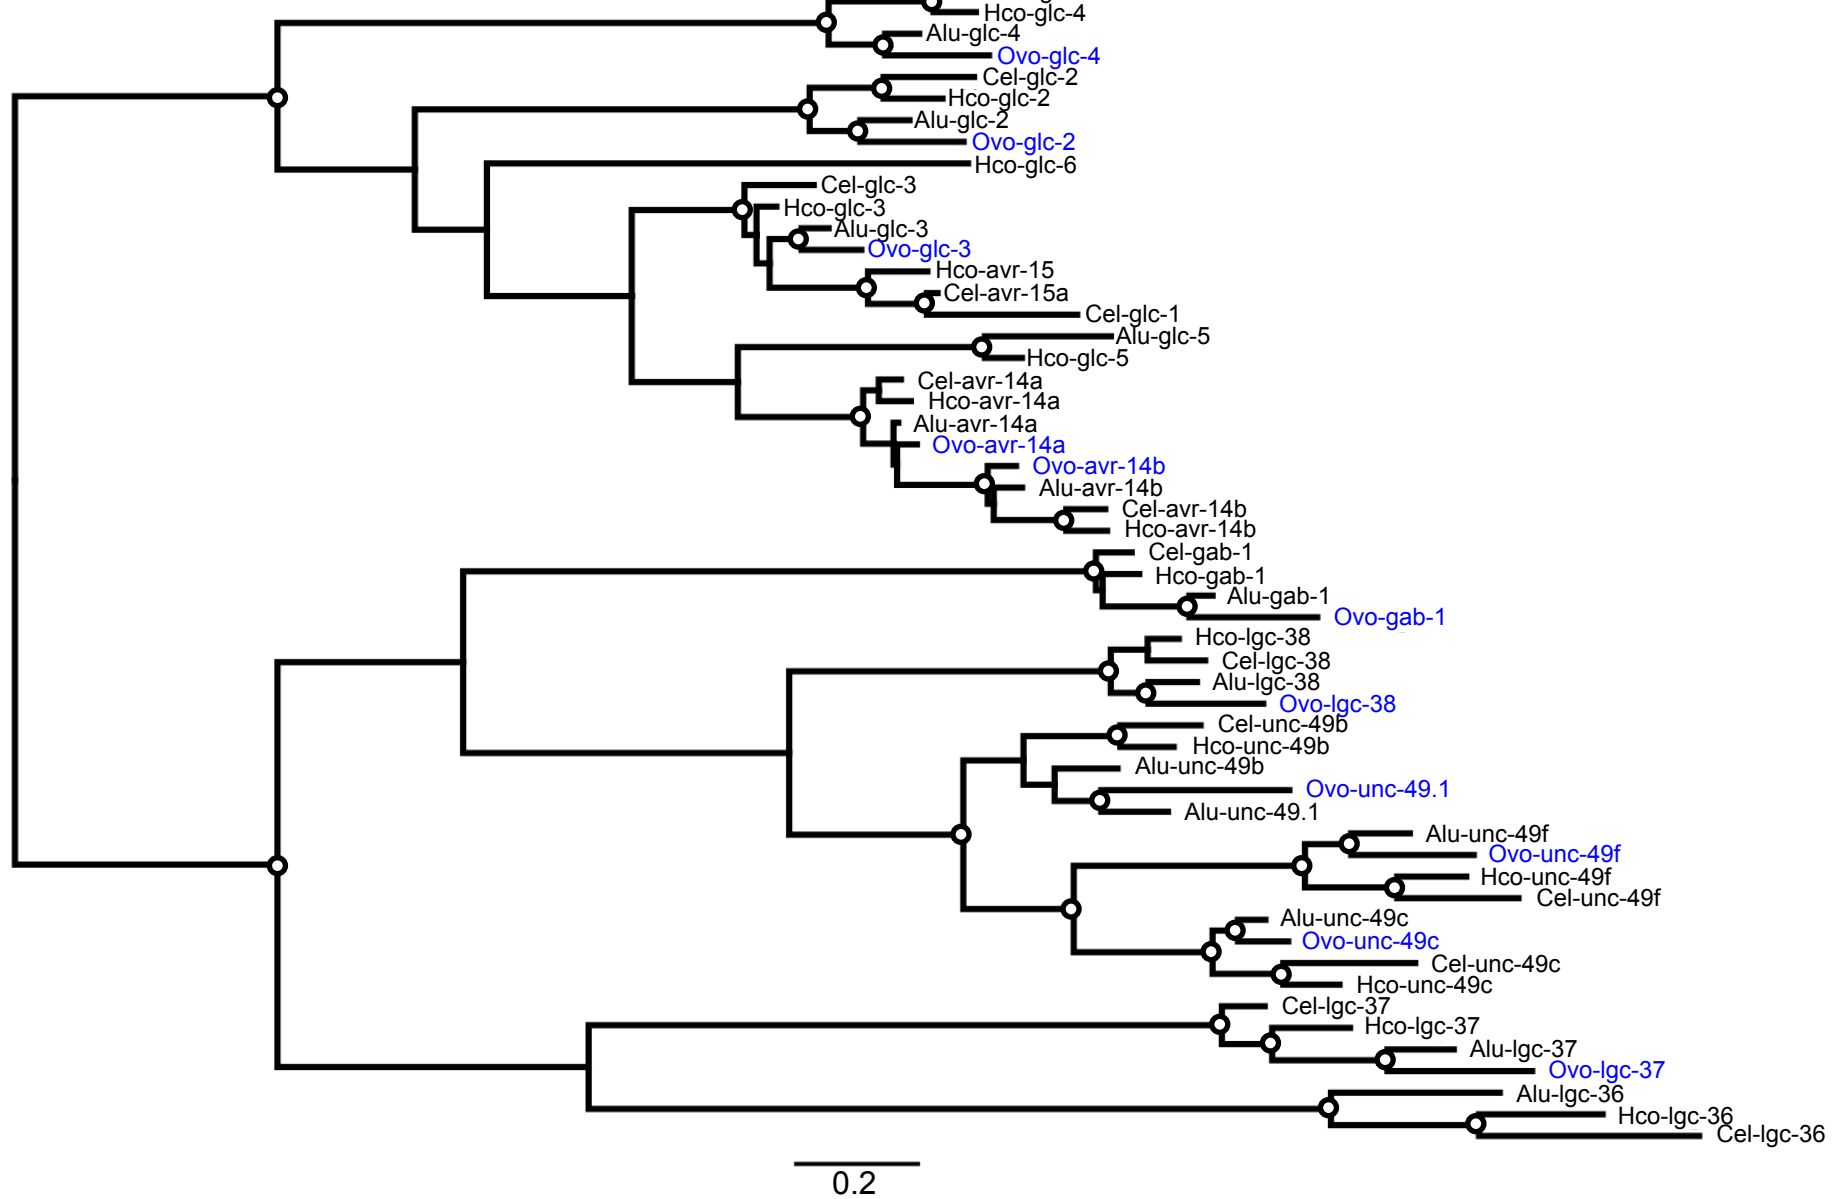



**Supplementary Figure 7. Nucleotide sequences for pLGIC subunits from the glutamate- and GABA- gated chloride-channel family** from *O. volvulus* and the representative species *A. lumbricoides*, *H. contortus* and *C. elegans* were aligned as codons using MAFFT v7.222<sup>1</sup>. Regions corresponding to the signal peptide, the intracellular loop between transmembrane regions 3 and 4 and the C-terminal beyond TM 4 were removed. The phylogeny shown was reconstructed using PhyML v20120412 with white circles indicating nodes with greater than 0.9 SH<sup>2</sup>. The tree is shown rooted by the division between the glutamate- and GABA channel subunits.

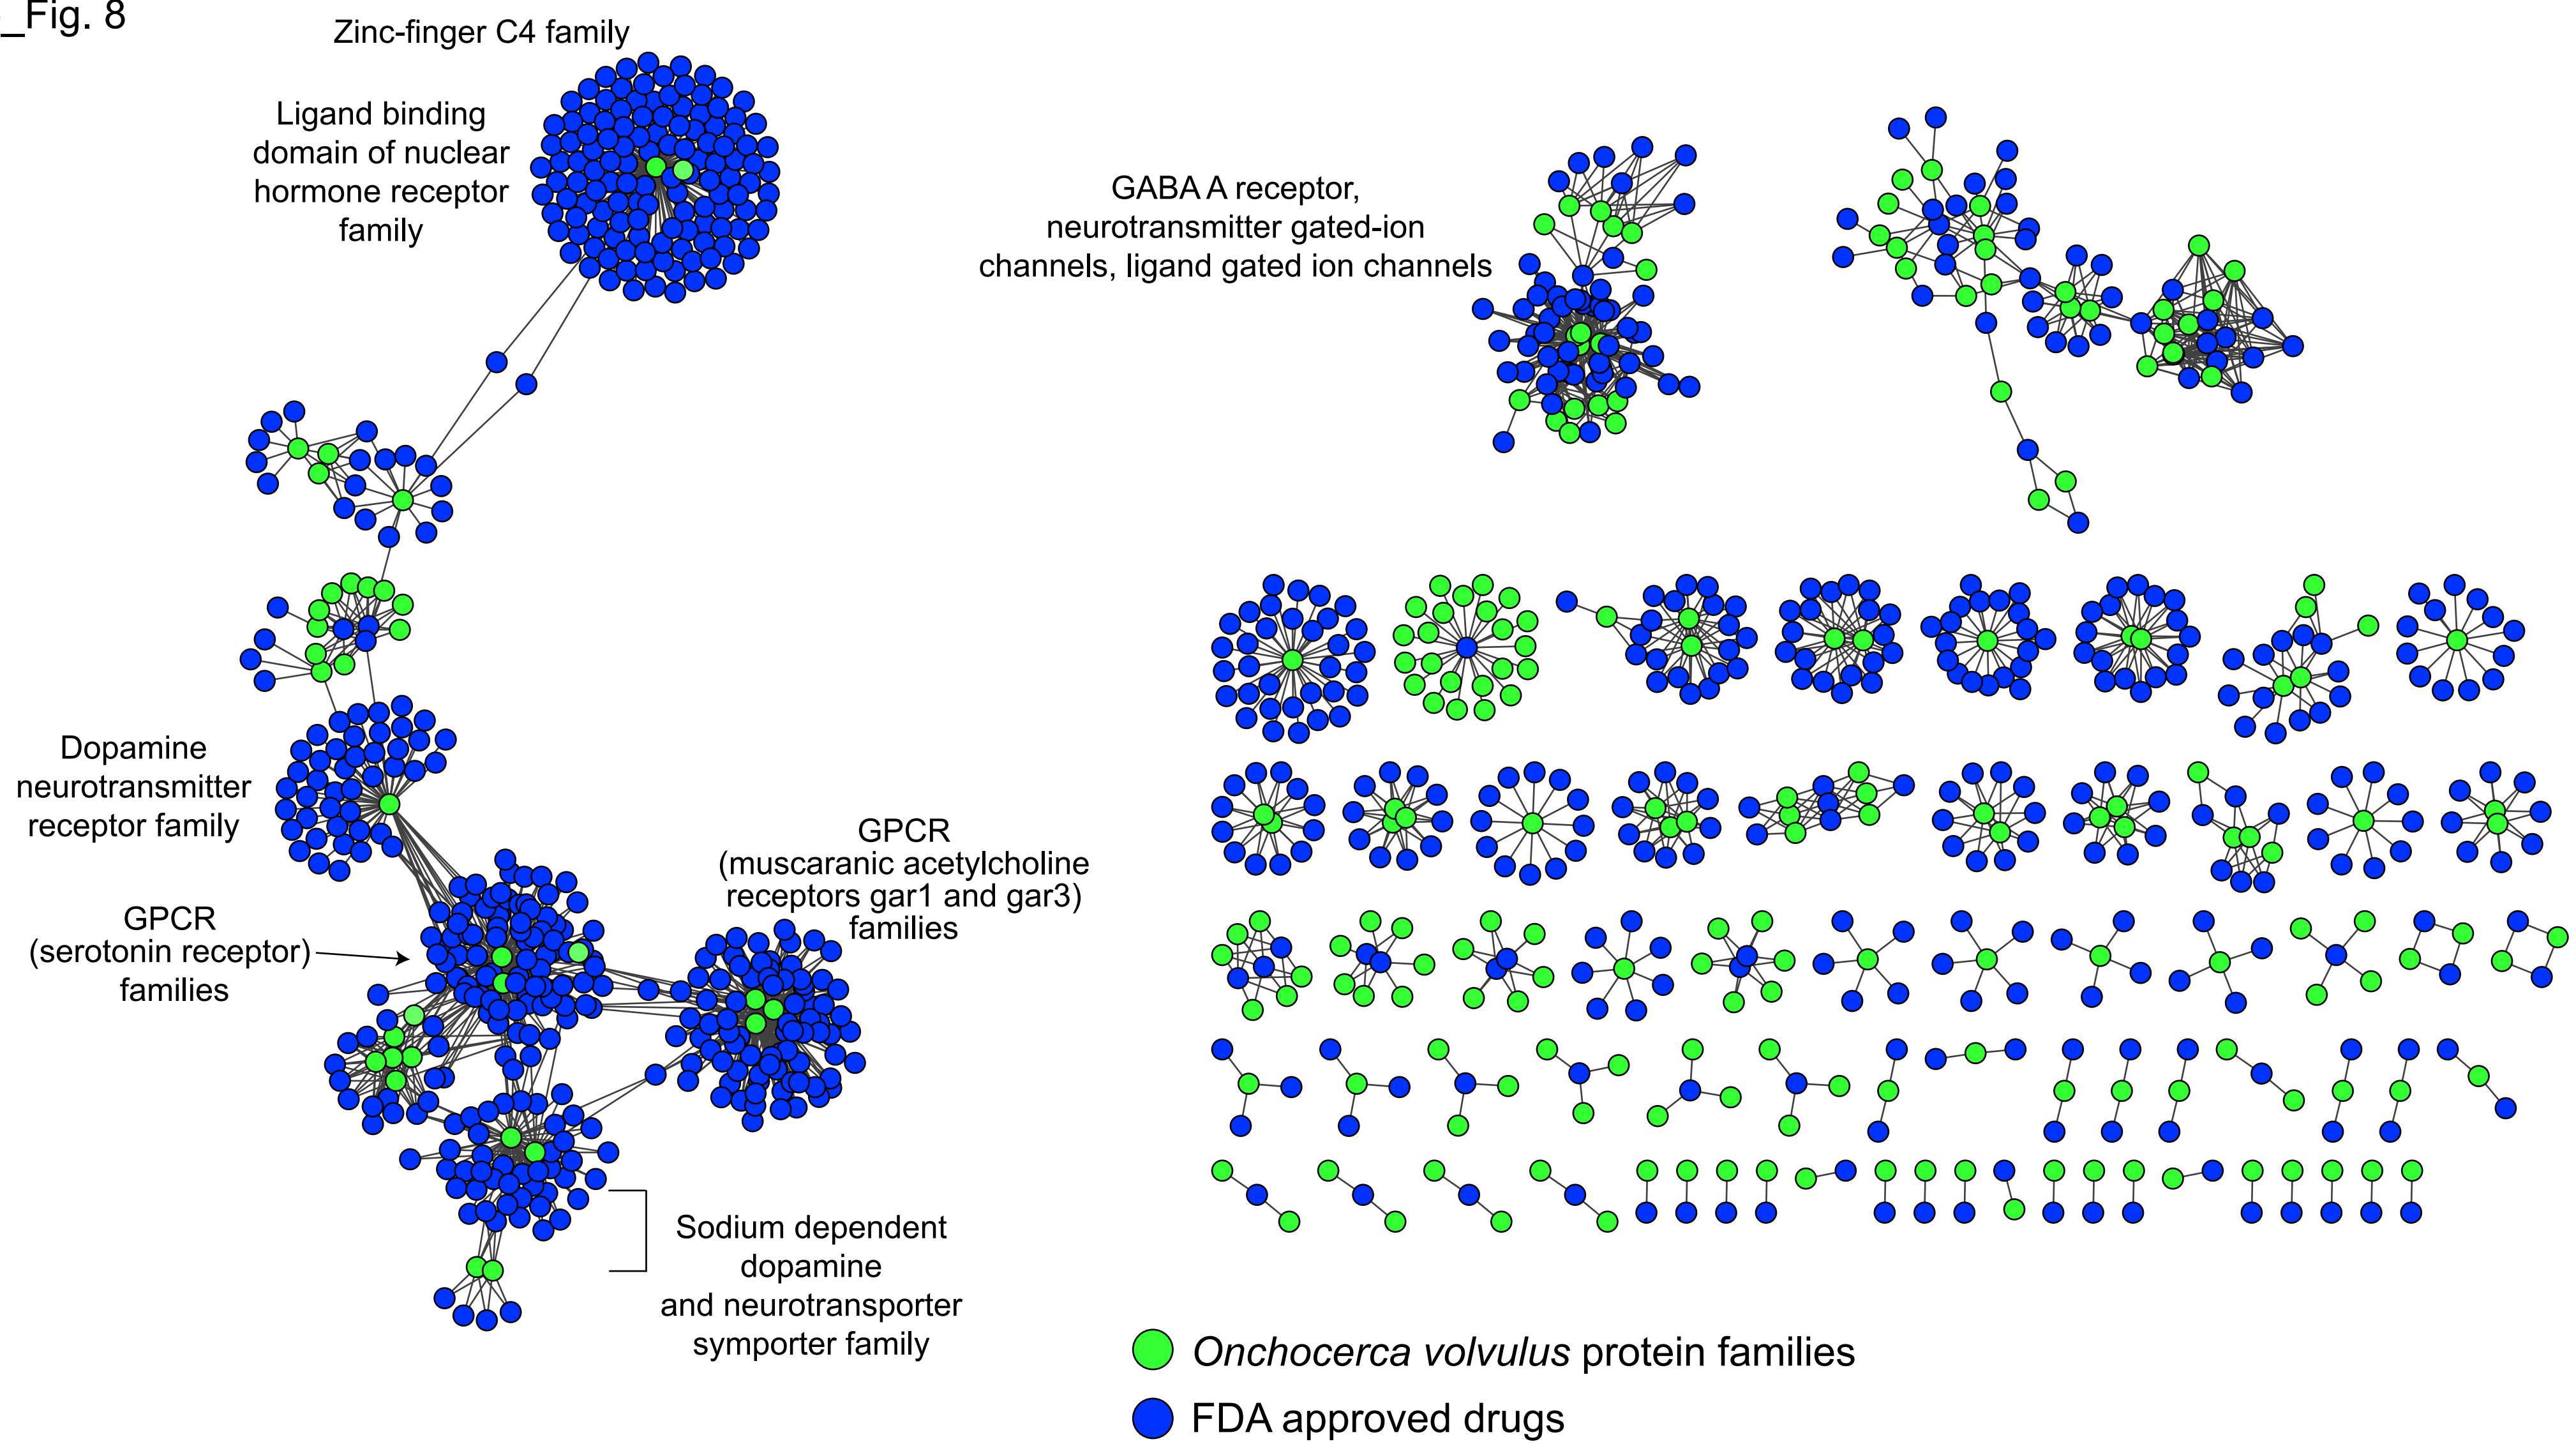

**Supplementary Figure 8. *O. volvulus* protein families identified as potential targets of FDA-approved drugs.** A network representation of FDA-approved drugs (blue circles) and their potential *O. volvulus* protein family targets (green circles). The predicted drug-protein family target connection is represented by a line connecting the respective circles. Protein families associated with the most drugs are named in the figure and considered 'privileged target families'.

## Supplementary Information References

1. Castresana, J. Selection of conserved blocks from multiple alignments for their use in phylogenetic analysis. *Mol Biol Evol* **17**, 540-52 (2000).
2. Guindon, S. *et al.* New algorithms and methods to estimate maximum-likelihood phylogenies: assessing the performance of PhyML 3.0. *Syst Biol* **59**, 307-21 (2010).
